# Supplementary material for: A highly effective polymerase chain reactionenhancer based on dendrimer-entrapped gold nanoparticles
Source: Royal Society of Chemistry journal article supplement (doi:10.1039/c1an15816c), 2011-11-07
Supplement: c1an15816c.pdf [file c1an15816c.pdf]

## Electronic Supplementary Information for

### **A highly effective polymerase chain reaction enhancer based on dendrimer-entrapped gold nanoparticles**

**Jingjing Chen,<sup>ab</sup> Xueyan Cao,<sup>b</sup> Rui Guo,<sup>b</sup> Mingwu Shen,<sup>b</sup> Chen Peng,<sup>a</sup> Tongyu Xiao<sup>b</sup> and Xiangyang Shi<sup>\*abc</sup>**

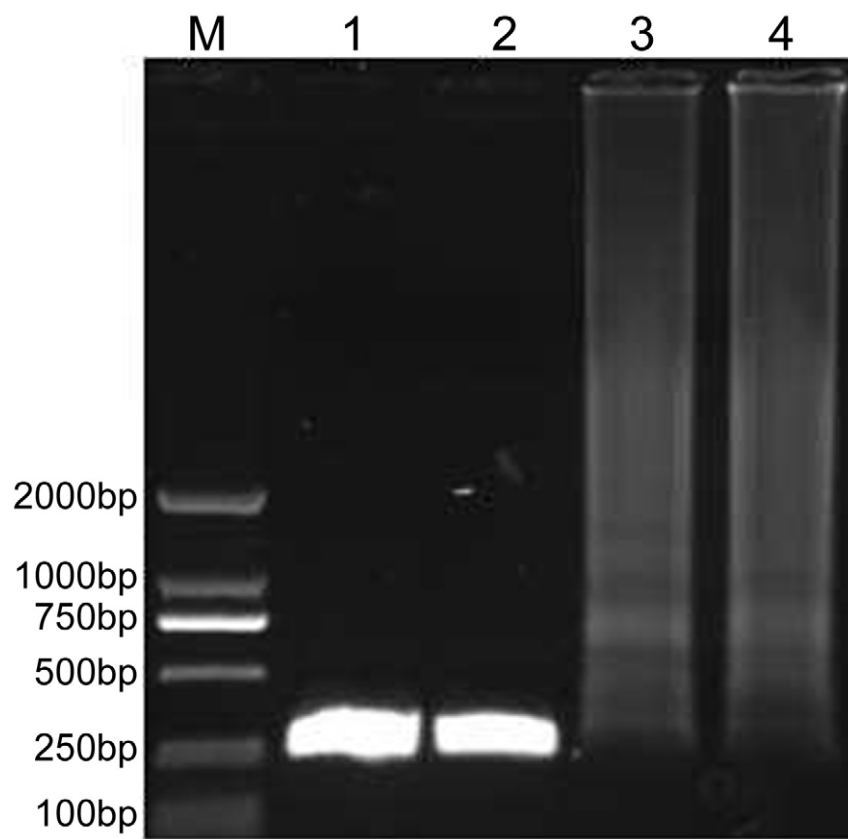

**Figure S1.** The results of the first-round PCR (Lanes 1 and 2) and two-round PCR amplification (Lanes 3 and 4). Lane M is for marker.
